# Supplementary material for: Evaluating Whether Radiofrequency Irradiation Attenuated UV-B-Induced Skin Pigmentation by Increasing Melanosomal Autophagy and Decreasing Melanin Synthesis
Source: MDPI journal article supplement (doi:10.3390/ijms221910724), 2021-10-03
Supplement: s1 [file s1]

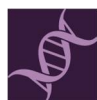

## Supplementary Tables

**Table S1.** Primer list for quantitative polymerase chain reaction used in this study.

| Gene          | Species | Primers |                                     |
|---------------|---------|---------|-------------------------------------|
| <i>TNFR</i>   | Human   | Forward | 5'-GAA TGT TAA GGG CAC TGA GGA C-3' |
|               |         | Reverse | 5'-AGG AGG GAT AAA AGG CAA AGA C-3' |
| <i>TLR4</i>   |         | Forward | 5'-TTC TTG CTG GCT GCA TAA AGT A-3' |
|               |         | Reverse | 5'-CAT TCC TTA CCC AGT CCT CAT C-3' |
| <i>NF-κB</i>  |         | Forward | 5'-GGA CCA GCA AAG GTT ATT GTT C-3' |
|               |         | Reverse | 5'-AGA TCC CAT CCT CAC AGT GTT T-3' |
| <i>MC1R</i>   |         | Forward | 5'-TCT GGG TTC TCT CAA CTC CAA T-3' |
|               |         | Reverse | 5'-CAT CTG GGA TGG ACA CAT ACA G-3' |
| <i>MITF</i>   |         | Forward | 5'-ATC ATC AGC CTG GAA TCA AGT T-3' |
|               |         | Reverse | 5'-ATC AAG TTT CCA GAG ACG GGT A-3' |
| <i>ACTB</i>   |         | Forward | 5'-GGG ACC TGA CTG ACT ACC TCA T-3' |
|               |         | Reverse | 5'-CCT TAA TGT CAC GCA CGA TTT-3'   |
| <i>Tnfr</i>   | Mouse   | Forward | 5'-GAG TGA GAC ACA CTT CCA GTG C-3' |
|               |         | Reverse | 5'-ACA CGG TGT TCT GAG TCT CCT T-3' |
| <i>Tlr4</i>   |         | Forward | 5'-ATT CAG AGC CGT TGG TGT ATC T-3' |
|               |         | Reverse | 5'-TCA AGG ACA ATG AAG ATG ATG C-3' |
| <i>Nf-κb</i>  |         | Forward | 5'-AGA AAT CCT ACC CAC AGG TCA A-3' |
|               |         | Reverse | 5'-CAT TTG TGA CCA ACT GAA CGA T-3' |
| <i>Fip200</i> |         | Forward | 5'-TGA ACA GAA AGA GCT TGC TCA G-3' |
|               |         | Reverse | 5'-GGT AAC ACA GAT GCA TCC TTC A-3' |
| <i>Ulk1</i>   |         | Forward | 5'-CCA GGA AAT GGC TAA TTC TGT C-3' |
|               |         | Reverse | 5'-GCA TAG TGT GCA GGT AGT CAG C-3' |
| <i>Ulk2</i>   |         | Forward | 5'-AAG GGA TAA TCC ACA GGG ATC T-3' |
|               |         | Reverse | 5'-ACC ACT GAC ATT CGA CTT CCT T-3' |
| <i>Atg13</i>  |         | Forward | 5'-CAT TTT CAG ACC CTA CTC CTG-3'   |
|               |         | Reverse | 5'-CTT GAG AGT TGAT GGG AAA AGG-3'  |
| <i>Atg101</i> |         | Forward | 5'-ACT ACA AGA AGG AGG GCA CGT A-3' |
|               |         | Reverse | 5'-GCA CAT AGG TGA AGT CGA TGA A-3' |
| <i>Actb</i>   |         | Forward | 5'-CCG TAA AGA CCT CTA TGC CAA C-3' |
|               |         | Reverse | 5'-GCA GTA ATC TCC TTC TGC ATC C-3' |
